# Supplementary material
Source: PubMed Central journal article supplement (PMC3140067)
Supplement: NIHMS294347-supplement-Supp_Data_S1.pdf [file NIHMS294347-supplement-Supp_Data_S1.pdf]

**Westphalen et al.** Radiological Imaging of Patients with Suspected Urinary Tract Stones: National Trends, Diagnoses, and Predictors

**Data Supplement 1:** ICD-9 CM codes for each group of alternative diagnoses.

| <b>Group 1</b> | <b>Group 2</b>                                                         | <b>Group 3</b>             | <b>Group 4</b>      |
|----------------|------------------------------------------------------------------------|----------------------------|---------------------|
| urolithiasis   | acute infectious / inflammatory processes (including pleural effusion) | acute cardiovascular event | malignant neoplasms |
| 592.x          | 464.xx                                                                 | 410.xx                     | 15x.x               |
| 594.x          | 465.xx                                                                 | 411.xx                     | 162.x               |
|                | 466.xx                                                                 | 413.xx                     | 163.x               |
|                | 48x.xx                                                                 | 415.xx                     | 164.x               |
|                | 510.x                                                                  | 417.xx                     | 165.x               |
|                | 512.x                                                                  | 42x.xx                     | 170.2               |
|                | 513.x                                                                  | 441.xx                     | 170.3               |
|                | 514.x                                                                  | 442.xx                     | 170.4               |
|                | 54x.xx                                                                 | 443.xx                     | 170.6               |
|                | 551.xx                                                                 | 444.xx                     | 171.4               |
|                | 556.xx                                                                 | 445.xx                     | 171.5               |
|                | 557.xx                                                                 | 446.xx                     | 171.6               |
|                | 567.xx                                                                 | 452                        | 171.7               |
|                | 569.5x                                                                 | 453.xx                     | 172.5               |
|                | 569.8x                                                                 |                            | 174.x               |
|                | 570.xx                                                                 |                            | 175.x               |
|                | 572.xx                                                                 |                            | 176.x               |
|                | 574. 0                                                                 |                            | 179                 |
|                | 574.3                                                                  |                            | 18x.x               |
|                | 574.6                                                                  |                            | 193                 |
|                | 574.8                                                                  |                            | 194 .0              |
|                | 575.0x                                                                 |                            | 194.6               |
|                | 575.1 0                                                                |                            | 194.8               |
|                | 575.12                                                                 |                            | 194.9               |
|                | 575.2x                                                                 |                            | 195.1               |
|                | 575.4x                                                                 |                            | 195.2               |
|                | 575.5x                                                                 |                            | 195.3               |
|                | 578.xx                                                                 |                            | 195.8               |
|                | 577. 0                                                                 |                            | 196.x               |
|                | 576.3                                                                  |                            | 197.x               |
|                | 576.4                                                                  |                            | 198.6               |
|                | 576.1                                                                  |                            | 198.7               |
|                | 590.xx                                                                 |                            | 198.8x              |
|                | 595.xx                                                                 |                            | 199.x               |
|                | 597.xx                                                                 |                            | 20x.xx              |
|                | 601.xx                                                                 |                            | 21x.x               |
|                | 604.xx                                                                 |                            | 22x.x               |
|                | 608.2x                                                                 |                            | 23x.xx              |
|                | 608.4                                                                  |                            |                     |
|                | 614. 0                                                                 |                            |                     |
|                | 614.2                                                                  |                            |                     |
|                | 614.3                                                                  |                            |                     |
|                | 614.5                                                                  |                            |                     |

614.8  
614.9  
617.xx  
620.4  
620.5  
620.6  
620.7  
620.8  
620.9
